# 1   **Programmed DNA elimination of germline development genes in songbirds**

2  
3   Cormac M. Kinsella<sup>1,2\*</sup>, Francisco J. Ruiz-Ruano<sup>3\*</sup>, Anne-Marie Dion-Côté<sup>1,4</sup>, Alexander J.  
4   Charles<sup>5</sup>, Toni I. Gossmann<sup>5</sup>, Josefa Cabrero<sup>3</sup>, Dennis Kappei<sup>6</sup>, Nicola Hemmings<sup>5</sup>, Mirre J. P.  
5   Simons<sup>5</sup>, Juan P. M. Camacho<sup>3</sup>, Wolfgang Forstmeier<sup>7</sup>, Alexander Suh<sup>1</sup>

6  
7   <sup>1</sup>Department of Evolutionary Biology, Evolutionary Biology Centre (EBC), Science for Life  
8   Laboratory, Uppsala University, SE-752 36, Uppsala, Sweden.

9   <sup>2</sup>Laboratory of Experimental Virology, Department of Medical Microbiology, Amsterdam UMC,  
10   University of Amsterdam, 1105 AZ, Amsterdam, The Netherlands.

11   <sup>3</sup>Department of Genetics, University of Granada, E-18071, Granada, Spain.

12   <sup>4</sup>Department of Molecular Biology & Genetics, Cornell University, NY 14853, Ithaca, United  
13   States.

14   <sup>5</sup>Department of Animal and Plant Sciences, University of Sheffield, S10 2TN, Sheffield, United  
15   Kingdom.

16   <sup>6</sup>Cancer Science Institute of Singapore, National University of Singapore, 117599, Singapore.

17   <sup>7</sup>Max Planck Institute for Ornithology, D-82319, Seewiesen, Germany.

18  
19   \*These authors contributed equally to this work (alphabetical order).

20  
21   Correspondence and requests for materials should be addressed to F.J.R.R. (email:  
22   fjruizruano@ugr.es) and A.S. (email: alexander.suh@ebc.uu.se).

## Summary

Genomes can vary within individual organisms. Programmed DNA elimination leads to dramatic changes in genome organisation during the germline–soma differentiation of ciliates<sup>1</sup>, lampreys<sup>2</sup>, nematodes<sup>3,4</sup>, and various other eukaryotes<sup>5</sup>. A particularly remarkable example of tissue-specific genome differentiation is the germline-restricted chromosome (GRC) in the zebra finch which is consistently absent from somatic cells<sup>6</sup>. Although the zebra finch is an important animal model system<sup>7</sup>, molecular evidence from its large GRC (>150 megabases) is limited to a short intergenic region<sup>8</sup> and a single mRNA<sup>9</sup>. Here, we combined cytogenetic, genomic, transcriptomic, and proteomic evidence to resolve the evolutionary origin and functional significance of the GRC. First, by generating tissue-specific *de-novo* linked-read genome assemblies and re-sequencing two additional germline and soma samples, we found that the GRC contains at least 115 genes which are paralogous to single-copy genes on 18 autosomes and the Z chromosome. We detected an amplification of  $\geq 38$  GRC-linked genes into high copy numbers (up to 185 copies) but, surprisingly, no enrichment of transposable elements on the GRC. Second, transcriptome and proteome data provided evidence for functional expression of GRC genes at the RNA and protein levels in testes and ovaries. Interestingly, the GRC is enriched for genes with highly expressed orthologs in chicken gonads and gene ontologies involved in female gonad development. Third, we detected evolutionary strata of GRC-linked genes. Genes such as *bicc1* and *trim71* have resided on the GRC for tens of millions of years, whereas dozens have become GRC-linked very recently. The GRC is thus likely widespread in songbirds (half of all bird species) and its rapid evolution may have contributed to their diversification. Together, our results demonstrate a highly dynamic evolutionary history of the songbird GRC leading to dramatic germline–soma genome differences as a novel mechanism to minimize genetic conflict between germline and soma.

## Text

Not all cells of an organism must contain the same genome. Some eukaryotes exhibit dramatic differences between their germline and somatic genomes, resulting from programmed DNA elimination of chromosomes or fragments thereof during germline–soma differentiation<sup>5</sup>. Here we present the first comprehensive analyses of a germline-restricted chromosome (GRC). The zebra finch (*Taeniopygia guttata*) GRC is the largest chromosome of this songbird<sup>6</sup> and likely comprises >10% of the genome (>150 megabases)<sup>7,10</sup>. Cytogenetic evidence suggests the GRC is inherited through the female germline, expelled late during spermatogenesis, and eliminated from the soma during early embryo development<sup>6,11</sup>. Previous analyses of a 19-kb intergenic region suggested that the GRC contains sequences with high similarity to regular chromosomes (‘A chromosomes’)<sup>8</sup>.

In order to reliably identify sequences as GRC-linked, we used a single-molecule sequencing technology not applied in birds before that permits reconstruction of long haplotypes through linked reads<sup>12</sup>. We generated separate haplotype-resolved *de-novo* genome assemblies for the germline and soma of a male zebra finch (testis and liver; ‘Seewiesen’; Supplementary Table 1). We further used the linked-read data to compare read coverage and haplotype barcode data in relation to the zebra finch somatic reference genome (‘taeGut2’)<sup>7</sup>, allowing us to identify sequences that are shared, amplified, or unique to the germline genome in a fashion similar to recent studies on cancer aneuploidies<sup>13</sup>. We also re-sequenced the germline and soma from two male zebra finches from another population (‘Spain’; testis and muscle) using short reads.

We first established the presence of the GRC in the three germline samples. Cytogenetic analysis using fluorescence *in-situ* hybridization (FISH) with a new GRC probe showed that the GRC is present exclusively in the germline and eliminated during spermatogenesis as hypothesised (Fig. 1a-b, Extended Data Fig. 1)<sup>6,11</sup>. We compared germline/soma sequencing coverage by mapping reads from all three sampled zebra finches onto the reference genome assembly (regular ‘A chromosomes’), revealing consistently germline-increased coverage for single-copy regions, similar to programmed DNA elimination of short genome fragments in lampreys<sup>2</sup> (Fig. 1c-d). A total of 92 regions (41 with >10 kb length) on 13 chromosomes exhibit >4-fold increased germline coverage in Seewiesen relative to the soma (Fig. 1e, Supplementary Table 2). Such a conservative coverage cut-off provides high confidence in true GRC-amplified regions. We obtained nearly identical confirmatory results with another sequencing technology using the Spanish birds (Fig. 1f). Notably, the largest block of testis-increased coverage spans nearly 1 Mb on chromosome 1 and overlaps with the previously<sup>8</sup> FISH-verified intergenic region 27L4 (Fig. 1e-f).

Our linked-read and re-sequencing approach allowed us to determine the sequence content of the GRC. The GRC is effectively a non-recombining chromosome as it recombines with itself after duplication, probably to ensure stable inheritance during female meiosis<sup>8</sup>. We predicted that the GRC would be highly enriched in repetitive elements, similar to the female-specific avian W chromosome (repeat density >50%)<sup>14</sup>. Surprisingly, neither assembly-based nor read-based repeat quantifications detected a significant enrichment in transposable elements or satellite repeats in the germline samples relative to the soma samples (Supplementary Text, Supplementary Table 3). Instead, most germline coverage peaks lie in single-copy regions of the reference genome

including 38 genes (Fig. 1e-f, Table 1), suggesting that these peaks stem from highly similar GRC-amplified paralogs with high copy numbers (up to 185 copies per gene; Supplementary Table 4). GRC linkage of these regions is further supported by sharing of linked-read barcodes between different amplified chromosomal regions in germline but not soma (Fig. 1g-h), suggesting that these regions reside on the same haplotype (Extended Data Fig. 2). We additionally identified 245 GRC-linked genes through germline-specific single-nucleotide polymorphisms (SNPs) present in read mapping of all three germline samples onto zebra finch reference genes (up to 402 SNPs per gene; Supplementary Table 4). As a control, we used the same methodology to screen for soma-specific SNPs and found no such genes. We conservatively consider the 38 GRC-amplified genes and those with at least 5 germline-specific SNPs as our highest-confidence set (Table 1). We also identified GRC-linked genes using germline–soma assembly subtraction and coverage differences (Fig. 1i); however, all were already found via coverage or SNP evidence (Table 1). Together with the *napa* gene recently identified in transcriptomes (Fig. 1j)<sup>9</sup>, our complementary approaches yielded 115 high-confidence GRC-linked genes with paralogs located on 18 autosomes and the Z chromosome (Table 1; all 267 GRC genes in Supplementary Table 4).

We next tested whether the GRC is functional and thus probably physiologically important using transcriptomics and proteomics. We sequenced RNA from the same tissues of the two Spanish birds used for genome re-sequencing and combined these with published testis and ovary RNA-seq data from North American domesticated zebra finches<sup>9,15</sup>. Among the 115 high-confidence genes, 6 and 32 were transcribed in testes and ovaries, respectively (Table 1). Note, these are only genes where we could reliably separate reads from GRC-linked and A-chromosomal

paralogs by GRC-specific SNPs in the transcripts (Fig. 2a-b, Extended Data Fig. 3, Supplementary Table 5). We next verified translation of GRC-linked genes through protein mass spectrometry data for 7 testes and 2 ovaries from another population ('Sheffield'). From 83 genes with GRC-specific amino acid changes, we identified peptides from 5 GRC-linked genes in testes and ovaries (Fig. 2c-d, Extended Data Fig. 4, Table 1, Supplementary Table 6). We hence established that many GRC-linked genes are transcribed and translated in adult male and female gonads, extending previous RNA evidence for a single gene<sup>9</sup> and refuting the hypothesis from cytogenetic studies that the GRC is silenced in the male germline<sup>16,17</sup>. Instead, we hypothesise that the GRC has important functions during germline development, which is supported by a significant enrichment in gene ontology terms related to reproductive developmental processes among GRC-linked genes (Fig. 2e, Supplementary Table 7). We further found that the GRC is significantly enriched in genes that are also germline-expressed in GRC-lacking species with available RNA expression data from many tissues<sup>18</sup> (Fig. 2f, Supplementary Table 8). Specifically, we found that 22 and 6 out of 65 chicken orthologs of high-confidence GRC-linked genes are most strongly expressed in chicken testis and ovary, respectively.

The observation that all identified GRC-linked genes have A-chromosomal paralogs allowed us to decipher the evolutionary origins of the GRC. We utilised phylogenies of GRC-linked genes and their A-chromosomal paralogs to infer when these genes copied to the GRC, similarly to the inference of evolutionary strata of sex chromosome differentiation<sup>19</sup>. First, the phylogeny of the intergenic 27L4 locus of our germline samples and a previous GRC sequence<sup>8</sup> demonstrated stable inheritance among the sampled zebra finch populations (Fig. 3a). Second, 37 gene trees of GRC-linked genes with germline-specific SNPs and available somatic genome data from other

birds identify at least five evolutionary strata (Fig. 3b-f, Extended Data Fig. 5, Table 1), with all but stratum 3 containing expressed genes (*cf.* Fig. 2a-d). Stratum 1 emerged during early songbird diversification, stratum 2 before the diversification of estrildid finches, and stratum 3 within estrildid finches (Fig. 3g). The presence of at least 7 genes in these three strata implies that the GRC is tens of millions of years old and likely present across songbirds (Extended Data Fig. 5), in line with a recent cytogenetics preprint<sup>20</sup>. Notably, stratum 4 is specific to the zebra finch species and stratum 5 to the Australian zebra finch subspecies (Fig. 3g), suggesting piecemeal addition of genes from 18 autosomes and the Z chromosome over millions of years of GRC evolution (Fig. 3h). The long-term residence of expressed genes on the GRC implies that they have been under selection, such as *bicc1* and *trim71* on GRC stratum 1 whose human orthologs are important for embryonic cell differentiation<sup>21</sup>. Additionally, we detected evidence for purifying selection on GRC-linked genes from older and younger strata using ratios of non-synonymous to synonymous substitutions (dN/dS; Supplementary Table 9), again implying that the GRC is an important chromosome with a long evolutionary history.

Here we provided the first evidence for the origin and functional significance of a GRC. Notably, our analyses suggest that the GRC emerged during early songbird evolution and we predict it to be present in half of all bird species. The species-specific addition of dozens of genes on stratum 5 implies that the rapidly evolving GRC likely contributed to reproductive isolation during the massive diversification of songbirds<sup>22</sup>. It was previously hypothesised that GRCs are formerly parasitic B chromosomes that became stably inherited after acquiring essential functions for the host<sup>23,24</sup>. Our evidence for an enrichment of germline-expressed genes on the zebra finch GRC is reminiscent of nematodes and lampreys where short genome fragments containing similar genes

are eliminated during germline–soma differentiation<sup>2-4</sup>. All these cases constitute extreme mechanisms of gene regulation through germline–soma gene removal rather than transcriptional repression<sup>3,5,10</sup>. Consequently, we hypothesise that the GRC became indispensable for its host by the acquisition of germline development genes. The aggregation of developmental genes on a single eliminated chromosome constitutes a novel mechanism to ensure germline-specific gene expression in multicellular organisms. This may allow adaptation to germline-specific functions free of deleterious effects on the soma which would otherwise arise from antagonistic pleiotropy.

## References (max. 30 references)

- 1 Chen, X. *et al.* The architecture of a scrambled genome reveals massive levels of genomic rearrangement during development. *Cell* **158**, 1187-1198 (2014).
- 2 Smith, J. J. *et al.* The sea lamprey germline genome provides insights into programmed genome rearrangement and vertebrate evolution. *Nat. Genet.* **50**, 270-277 (2018).
- 3 Wang, J. *et al.* Silencing of germline-expressed genes by DNA elimination in somatic cells. *Dev. Cell* **23**, 1072-1080 (2012).
- 4 Wang, J. *et al.* Comparative genome analysis of programmed DNA elimination in nematodes. *Genome Res.* **27**, 2001-2014 (2017).
- 5 Wang, J. & Davis, R. E. Programmed DNA elimination in multicellular organisms. *Curr. Opin. Genet. Dev.* **27**, 26-34 (2014).
- 6 Pigozzi, M. I. & Solari, A. J. Germ cell restriction and regular transmission of an accessory chromosome that mimics a sex body in the zebra finch, *Taeniopygia guttata*. *Chromosome Res.* **6**, 105-113 (1998).
- 7 Warren, W. C. *et al.* The genome of a songbird. *Nature* **464**, 757–762 (2010).
- 8 Itoh, Y., Kampf, K., Pigozzi, M. I. & Arnold, A. P. Molecular cloning and characterization of the germline-restricted chromosome sequence in the zebra finch. *Chromosoma* **118**, 527-536 (2009).
- 9 Biederman, M. K. *et al.* Discovery of the first germline-restricted gene by subtractive transcriptomic analysis in the zebra finch, *Taeniopygia guttata*. *Curr. Biol.* **28**, 1620-1627 (2018).
- 10 Smith, J. J. Programmed DNA elimination: keeping germline genes in their place. *Curr. Biol.* **28**, R601-R603 (2018).
- 11 Pigozzi, M. I. & Solari, A. J. The germ-line-restricted chromosome in the zebra finch: recombination in females and elimination in males. *Chromosoma* **114**, 403-409 (2005).
- 12 Weisenfeld, N. I., Kumar, V., Shah, P., Church, D. M. & Jaffe, D. B. Direct determination of diploid genome sequences. *Genome Res.* **27**, 757-767 (2017).



- 197 13 Bell, J. M. *et al.* Chromosome-scale mega-haplotypes enable digital karyotyping of cancer  
198 aneuploidy. *Nucleic Acids Res.* **45**, e162-e162 (2017).
- 199 14 Kapusta, A. & Suh, A. Evolution of bird genomes—a transposon's-eye view. *Ann. N. Y.*  
200 *Acad. Sci.* **1389**, 164–185 (2017).
- 201 15 Singhal, S. *et al.* Stable recombination hotspots in birds. *Science* **350**, 928-932 (2015).
- 202 16 del Priore, L. & Pigozzi, M. I. Histone modifications related to chromosome silencing and  
203 elimination during male meiosis in Bengalese finch. *Chromosoma* **123**, 293-302 (2014).
- 204 17 Goday, C. & Pigozzi, M. I. Heterochromatin and histone modifications in the germline-  
205 restricted chromosome of the zebra finch undergoing elimination during spermatogenesis.  
206 *Chromosoma* **119**, 325-336 (2010).
- 207 18 Marin, R. *et al.* Convergent origination of a *Drosophila*-like dosage compensation  
208 mechanism in a reptile lineage. *Genome Res.* **27**, 1974-1987 (2017).
- 209 19 Lahn, B. T. & Page, D. C. Four evolutionary strata on the human X chromosome. *Science*  
210 **286**, 964-967 (1999).
- 211 20 Torgasheva, A. A. *et al.* Germline-restricted chromosome (GRC) is widespread among  
212 songbirds. *bioRxiv* doi:10.1101/414276 (2018).
- 213 21 Uhlén, M. *et al.* Tissue-based map of the human proteome. *Science* **347** (2015).
- 214 22 Moyle, R. G. *et al.* Tectonic collision and uplift of Wallacea triggered the global songbird  
215 radiation. *Nat. Commun.* **7**, 12709 (2016).
- 216 23 Camacho, J. P. M. B chromosomes. in *The Evolution of the Genome* (ed T. Ryan  
217 Gregory) 223-286 (Elsevier Academic Press, 2005).
- 218 24 Camacho, J. P. M., Sharbel, T. F. & Beukeboom, L. W. B-chromosome evolution. *Philos.*  
219 *Trans. R. Soc. B* **355**, 163-178 (2000).
- 220 25 Hooper, D. M. & Price, T. D. Rates of karyotypic evolution in Estrildid finches differ  
221 between island and continental clades. *Evolution* **69**, 890-903 (2015).

222

223 **Acknowledgements** We thank Moritz Hertel, Martin Irestedt, Regine Jahn, Max Käller, Bart  
224 Kempnaers, Ulrich Knief, Pedro Lanzas, Juan Gabriel Martínez, Remi-André Olsen, Mattias  
225 Ormestad, Yifan Pei, Douglas Scofield, Linnéa Smeds, and members of the Barbash lab and the  
226 Suh lab for support and discussions. Mozes Blom, Jesper Boman, Nazeefa Fatima, James  
227 Galbraith, Octavio Palacios, and Matthias Weissensteiner provided helpful comments on an  
228 earlier version of this manuscript. A.S. was supported by grants from the Swedish Research  
229 Council Formas (2017-01597), the Swedish Research Council Vetenskapsrådet (2016-05139),  
230 and the SciLifeLab Swedish Biodiversity Program (2015-R14). The Swedish Biodiversity  
231 Program has been made available by support from the Knut and Alice Wallenberg Foundation.  
232 F.J.R.R., J.C., and J.P.M.C. were supported by the Spanish Secretaría de Estado de Investigación,  
233 Desarrollo e Innovación (CGL2015-70750-P), including FEDER funds, and F.J.R.R. was also  
234 supported by a Junta de Andalucía fellowship. A.M.D.C was supported by a postdoc fellowship  
235 from Sven och Lilly Lawskis fond. T.I.G. was supported by a Leverhulme Early Career

Fellowship Grant (ECF-2015-453). T.I.G., A.J.C. (CABM DTP), and M.S. were supported by a NERC grant (NE/N013832/1). N.H. was supported by a Patrick & Irwin-Packington Fellowship from the University of Sheffield and a Royal Society Dorothy Hodgkin Fellowship. W.F. was supported by the Max Planck Society. Some of the computations were performed on resources provided by the Swedish National Infrastructure for Computing (SNIC) through Uppsala Multidisciplinary Center for Advanced Computational Science (UPPMAX). The authors acknowledge support from the National Genomics Infrastructure in Stockholm funded by Science for Life Laboratory, the Knut and Alice Wallenberg Foundation and the Swedish Research Council.

**Author Contributions** Conceptualization: W.F., A.S., J.P.M.C., F.J.R.R., C.M.K., A.M.D.C.; cytogenetics: J.P.M.C., F.J.R.R., J.C.; genomics: A.S., C.M.K., F.J.R.R., A.M.D.C.; transcriptomics: F.J.R.R.; proteomics: T.I.G., A.J.C., D.K., M.S., N.H.; gene enrichment: C.M.K., W.F.; phylogenies: F.J.R.R., A.S., C.M.K.; manuscript writing: A.S. with input from all authors; supervision: A.S., J.P.M.C. All authors read and approved the manuscript.

**Author Information** The authors declare no competing financial interests. Correspondence and requests for materials should be addressed to F.J.R.R. (email: [fjruizruano@ugr.es](mailto:fjruizruano@ugr.es)) and A.S. ([alexander.suh@ebc.uu.se](mailto:alexander.suh@ebc.uu.se)).

## Tables and Figures

258 **Table 1 | The 115 high-confidence genes on GRC with information on their A-chromosomal origin in the**  
 259 **reference genome taeGut2, number of testis-specific SNPs, methods supporting their GRC linkage,**  
 260 **testis/ovary RNA expression of the GRC paralog, testis/ovary protein expression of the GRC paralog, and**  
 261 **evolutionary stratum on the GRC.**

| Gene symbol | Chr.      | Start     | End       | SNPs | Method         | RNA evidence | Protein evidence | GRC stratum |
|-------------|-----------|-----------|-----------|------|----------------|--------------|------------------|-------------|
| AAGAB       | 10        | 19608548  | 19634367  | 10   | SNPs           |              |                  | S5          |
| ADGRL2      | 8         | 14047115  | 14171612  | 10   | SNPs           |              |                  |             |
| ADGRL3      | 4         | 14919933  | 15404594  | 8    | SNPs           | ovary        |                  |             |
| AKIRIN2     | 3         | 78683482  | 78688947  | 6    | SNPs           | ovary        |                  | S5          |
| ALDH18A1    | 6         | 36280145  | 36301392  | 17   | SNPs           |              |                  | S4          |
| ALG13       | 4A        | 18474239  | 18501426  | 19   | SNPs           | ovary        |                  |             |
| ARMC6       | 28        | 4942046   | 4946063   | 5    | SNPs           |              |                  |             |
| ATP2A2      | 15        | 2841010   | 2879975   | 8    | SNPs           |              |                  |             |
| BICC1       | 6         | 6355408   | 6434911   | 402  | SNPs           | ovary        |                  | S1          |
| BMP15       | 4A        | 15596686  | 15598225  | 29   | SNPs, coverage | ovary        |                  | S5          |
| BMPR1B      | 4         | 18997710  | 19024248  | 47   | SNPs, coverage |              |                  | S5          |
| CCND3       | 26_random |           |           | 14   | SNPs           |              |                  |             |
| CD164       | 3         | 69169111  | 69174605  | 38   | SNPs, coverage | ovary        |                  |             |
| COPS2       | 10        | 10200701  | 10222248  | 1    | SNPs, coverage | ovary        |                  |             |
| CPEB1       | 10        | 3114181   | 3137661   | 114  | SNPs           | ovary        |                  |             |
| CSNK1A1L    | Un        | 135422201 | 135425792 | NA   | coverage       |              |                  |             |
| CXCL14      | 13        | 9423543   | 9433139   | 12   | SNPs           |              |                  | S5          |
| DDX49       | 28        | 4913058   | 4918451   | 5    | SNPs           | ovary        |                  |             |
| DIS3L       | 10        | 19097281  | 19112154  | 13   | SNPs           | ovary        |                  | S5          |
| DNAAF5      | 14        | 13758049  | 13780402  | NA   | coverage       |              |                  |             |
| DNAH5       | 2         | 81235805  | 81361091  | 7    | SNPs           |              |                  |             |
| DPH6        | 5         | 31543945  | 31606965  | 13   | SNPs, coverage |              |                  |             |
| EFNB1       | 4A        | 5764021   | 5807953   | 86   | SNPs           | ovary        |                  | S5          |
| ELAVL4      | 8         | 21034240  | 21098310  | 364  | SNPs           | ovary        |                  |             |

|              |           |           |           |    |                |       |  |    |
|--------------|-----------|-----------|-----------|----|----------------|-------|--|----|
| EPPK1        | Un        |           |           | 52 | SNPs           |       |  |    |
| FBXO16       | 3         | 112541865 | 112568948 | 6  | SNPs           |       |  |    |
| FEM1B        | 10        | 19886491  | 19891616  | 9  | SNPs           | ovary |  | S5 |
| FIG4         | 3         | 69023384  | 69073678  | 17 | SNPs           |       |  | S5 |
| FRS3         | 26_random |           |           | 42 | SNPs, coverage |       |  | S5 |
| GBE1         | 1         | 105820640 | 105934310 | 4  | SNPs, coverage |       |  |    |
| INTS9        | 3         | 112259951 | 112313512 | NA | coverage       |       |  |    |
| LIAS         | 4         | 48132714  | 48139736  | 42 | SNPs           |       |  | S2 |
| LIN54        | 4         | 13615974  | 13637371  | 17 | SNPs           |       |  |    |
| LINC02027    | 1         | 106086596 | 106087033 | NA | coverage       |       |  |    |
| LMBRD2       | Z         | 41646446  | 41665840  | NA | coverage       |       |  |    |
| LOC100223190 | Z         | 69149414  | 69156994  | 41 | SNPs           |       |  |    |
| LOC100224235 | Un        |           |           | 5  | SNPs           |       |  | S5 |
| LOC100225322 | 1A        | 47543094  | 47544622  | 6  | SNPs           | ovary |  |    |
| LOC100227189 | Un        | 150797142 | 150801997 | NA | coverage       |       |  |    |
| LOC100228170 | Un        | 55540047  | 55541360  | NA | coverage       |       |  |    |
| LOC101233087 | Z         | 47991391  | 47994344  | 7  | SNPs           |       |  |    |
| LOC101233688 | 5         | 937818    | 939059    | 5  | SNPs           |       |  | S5 |
| LOC101233767 | 18        | 8034939   | 8038005   | 11 | SNPs           |       |  |    |
| LOC101233800 | Un        |           |           | 16 | SNPs           |       |  |    |
| LOC101234253 | 10        | 19184028  | 19186114  | 7  | SNPs           | ovary |  | S5 |
| LOC105758464 | 23        | 46808     | 60360     | 14 | SNPs           |       |  | S5 |
| LOC105758894 | 26_random |           |           | 5  | SNPs           |       |  |    |

|              |           |          |          |    |                |        |  |    |
|--------------|-----------|----------|----------|----|----------------|--------|--|----|
| LOC105758976 | 2         | 34301994 | 34306899 | 16 | SNPs           |        |  |    |
| LOC105759101 | 3         | 76396180 | 76401262 | 21 | SNPs           |        |  |    |
| LOC105759167 | 4A        | 15573874 | 15574621 | 5  | SNPs           |        |  |    |
| LOC105759195 | 4         | 14453003 | 14473747 | 18 | SNPs           |        |  |    |
| LOC105759199 | 4         | 20714525 | 20720872 | 11 | SNPs           |        |  |    |
| LOC105759260 | 5         | 1874731  | 1886007  | 32 | SNPs           |        |  | S5 |
| LOC105759646 | Un        |          |          | 7  | SNPs           |        |  |    |
| LOC105759655 | Un        |          |          | 8  | SNPs           |        |  |    |
| LOC105759660 | Un        |          |          | 18 | SNPs           |        |  |    |
| LOC105759665 | Un        |          |          | 5  | SNPs           |        |  |    |
| LOC105759692 | Un        |          |          | 12 | SNPs           |        |  |    |
| LOC105759919 | Un        |          |          | 8  | SNPs           |        |  |    |
| LOC105760011 | Un        |          |          | 7  | SNPs           |        |  |    |
| LOC105760123 | Un        |          |          | 18 | SNPs           |        |  |    |
| LOC105760228 | Un        |          |          | 14 | SNPs           |        |  |    |
| LOC105760286 | Un        |          |          | 18 | SNPs           |        |  |    |
| LOC105760461 | Un        |          |          | 10 | SNPs           |        |  |    |
| LOC105760874 | Z         | 60949696 | 60953194 | 19 | SNPs           | testis |  |    |
| LOC105760936 | 16_random |          |          | 12 | SNPs           |        |  |    |
| LUC7L3       | Un        | 35019850 | 35021569 | NA | coverage       |        |  |    |
| MED20        | 26_random | 110500   | 113183   | 28 | SNPs, coverage |        |  | S5 |

|           |           |           |           |    |                       |        |        |    |
|-----------|-----------|-----------|-----------|----|-----------------------|--------|--------|----|
| MSH4      | 8         | 27964612  | 27983306  | 30 | SNPs                  |        |        | S4 |
| NAPA      | NA        |           |           | NA | Biederman et al. 2018 |        | both   |    |
| NEUROG1   | 13        | 9450787   | 9451086   | 6  | SNPs                  |        |        |    |
| NFYA      | 26        | 4725655   | 4735626   | 7  | SNPs                  |        |        | S5 |
| NRBP2     | 2         | 156379345 | 156398225 | 48 | SNPs                  |        |        |    |
| PCSK4     | 28        | 4059367   | 4063775   | 21 | SNPs                  |        |        |    |
| PGC       | 26_random |           |           | 24 | SNPs                  |        |        |    |
| PHKA1     | 4A        | 15562688  | 15593666  | 16 | SNPs                  |        |        |    |
| PIM1      | 26        | 603349    | 607242    | 50 | SNPs                  | testis |        |    |
| PIM3      | 1A        | 18426716  | 18430551  | 81 | SNPs                  | ovary  |        |    |
| PMM1      | 1A        | 49038672  | 49047011  | NA | coverage              |        |        |    |
| PRDM1     | 3         | 70624594  | 70644625  | 12 | SNPs                  |        |        |    |
| PRKAR1A   | 18        | 2200317   | 2211579   | NA | coverage              |        |        |    |
| PRKAR1B   | 14        | 13784578  | 13872733  | NA | coverage              |        |        |    |
| PRPSAP1   | 18        | 8008870   | 8033058   | 7  | SNPs, coverage        | ovary  |        | S5 |
| PSIP1     | Z         | 59887174  | 59919902  | 57 | SNPs, coverage        | ovary  |        | S3 |
| PUF60     | 2         | 156354670 | 156376091 | 63 | SNPs                  | ovary  |        |    |
| RFC1      | 4         | 48169638  | 48202709  | 77 | SNPs                  | ovary  |        | S2 |
| RNF157    | 18        | 8048721   | 8062403   | NA | coverage              |        |        |    |
| RNF17     | 1         | 45827734  | 45870640  | 69 | SNPs                  | ovary  | testis | S4 |
| RNF20     | Z_random  |           |           | 9  | SNPs, subtraction     | both   |        |    |
| ROBO1     | 1         | 107094521 | 107228509 | 19 | SNPs, coverage        | ovary  |        | S5 |
| ROBO2     | 1         | 107529365 | 107979302 | 25 | SNPs                  |        |        |    |
| RXRA      | 17        | 8320685   | 8355067   | 14 | SNPs                  |        |        | S5 |
| SCRIB     | 2         | 156239884 | 156325797 | 83 | SNPs                  | ovary  |        | S5 |
| SECISBP2L | 10        | 10159176  | 10193647  | 60 | SNPs, coverage        | ovary  | both   | S5 |

|         |           |           |           |     |                             |        |       |    |
|---------|-----------|-----------|-----------|-----|-----------------------------|--------|-------|----|
| SHC4    | 10        | 10124441  | 10151124  | 11  | SNPs, coverage              |        |       | S4 |
| SPHK1   | 18        | 7991834   | 7994408   | 2   | SNPs, coverage              | testis |       |    |
| SRRT    | Un        |           |           | 16  | SNPs                        | both   |       |    |
| SUGP2   | 28        | 4930094   | 4937971   | 33  | SNPs                        | ovary  | both  | S5 |
| SURF4   | 17        | 7682661   | 7693000   | 50  | SNPs                        | ovary  |       | S3 |
| TFEB    | 26_random | 20475     | 21840     | 11  | SNPs                        |        |       | S5 |
| TIAM2   | 3         | 54800961  | 54890499  | NA  | coverage                    |        |       |    |
| TRIM71  | 2         | 60893878  | 60907039  | 159 | SNPs, subtraction           |        |       | S1 |
| UBE2O   | 18        | 7960889   | 7981633   | NA  | coverage                    |        |       |    |
| UGDH    | 4         | 48113314  | 48126079  | 136 | SNPs, coverage, subtraction | ovary  | ovary | S2 |
| UNC5C   | 4         | 19035187  | 19126466  | 13  | SNPs, coverage              |        |       |    |
| Unnamed | Un        | 124574513 | 124575553 | NA  | coverage                    |        |       |    |
| Unnamed | Un        | 127129819 | 127130503 | NA  | coverage                    |        |       |    |
| Unnamed | 16_random | 26580     | 73126     | NA  | coverage                    |        |       |    |
| Unnamed | Un        | 130103514 | 130104264 | NA  | coverage                    |        |       |    |
| Unnamed | Un        | 50859565  | 50860210  | NA  | coverage                    |        |       |    |
| Unnamed | Un        | 115355883 | 115358154 | NA  | coverage                    |        |       |    |
| Unnamed | Un        | 124578595 | 124579326 | NA  | coverage                    |        |       |    |
| VEGFA   | 3         | 31631385  | 31652650  | 34  | SNPs, coverage              | both   |       |    |
| WDR19   | 4         | 48204115  | 48240398  | 34  | SNPs                        | ovary  |       | S5 |
| ZWILCH  | 10        | 19199771  | 19206407  | 8   | SNPs                        | ovary  |       | S5 |

Note: We were able to place only some genes on evolutionary strata due to our strict criteria for evaluating the maximum likelihood gene trees. The remaining genes lacked sequence information from several of the other sampled somatic genomes or had poorly resolved tree topologies.

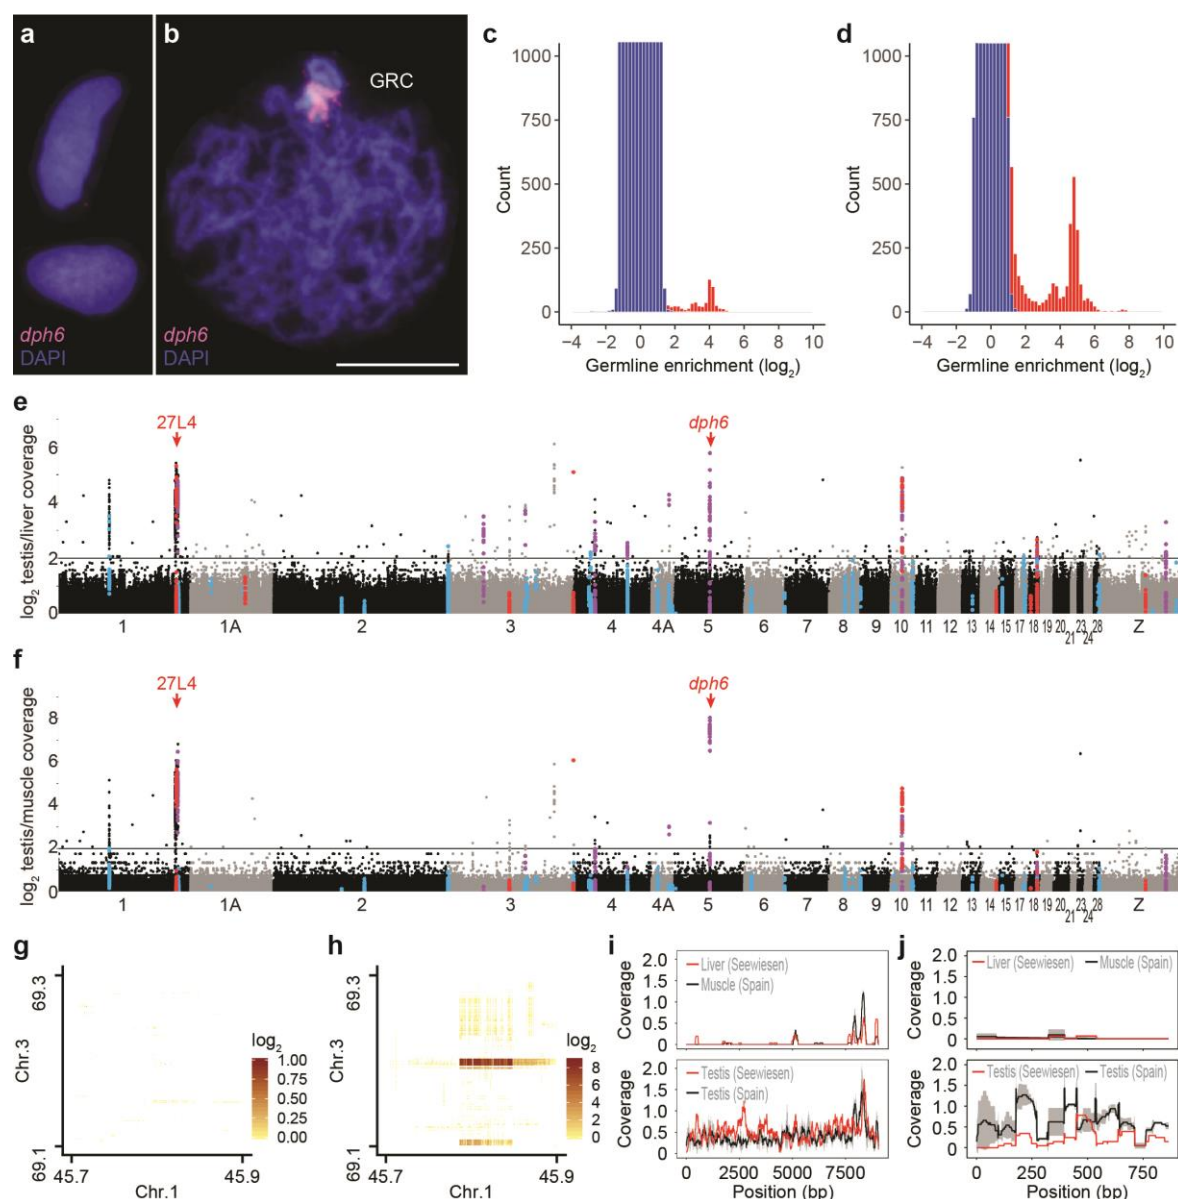

**Figure 1 | The zebra finch germline-restricted chromosome contains genes copied from many A chromosomes.**

**a-b,** Cytogenetic evidence for GRC absence in muscle (**a**) and GRC presence in the testis (**b**) of the same bird (Spain\_1) using fluorescence *in-situ* hybridization (FISH) of our new GRC-ampliconic probe *dph6* (selected due its high germline/soma coverage ratio; cf. panels e-f). The scale bar indicates 10  $\mu$ m. **c-d,** Comparison of germline/soma coverage ratios (red) for 1 kb windows with an expected symmetrical distribution (blue) indicates enrichment of single-copy regions in the germline, similar to lamprey<sup>2</sup> both in Spain (average of Spain\_1 and Spain\_2 coverage; PCR-free short reads) and Seewiesen (linked reads) samples. Y-axis is truncated for visualisation. **e-f,** Manhattan plot of germline/soma coverage ratios in 1 kb windows across chromosomes of the somatic reference genome *taeGut2*. Colours indicate high-confidence GRC-linked genes and their identification (red: coverage, blue: SNPs, purple: both; Table 1). Note that the similarities between Seewiesen (**e**) and Spain\_1/Spain\_2 averages (**f**) constitute independent biological replicates for GRC-ampliconic regions, as the data are based on different domesticated populations and different library preparation methods. Red arrows denote two FISH-verified GRC-amplified regions (cf. panel b)<sup>8</sup>. Only chromosomes >5 Mb are shown for clarity. **g-h,** Linked-read barcode interaction heatmaps of an inter-chromosomal rearrangement on the GRC absent in Seewiesen liver (**g**) but present in Seewiesen testis (**h**). **i-j,** Coverage plots of two examples of GRC-linked genes that are divergent from their A-chromosomal paralog, *trim71* (**i**) and *napa* (**j**)<sup>9</sup>, and thus have very low coverage (normalized by total reads and genome size) in soma.



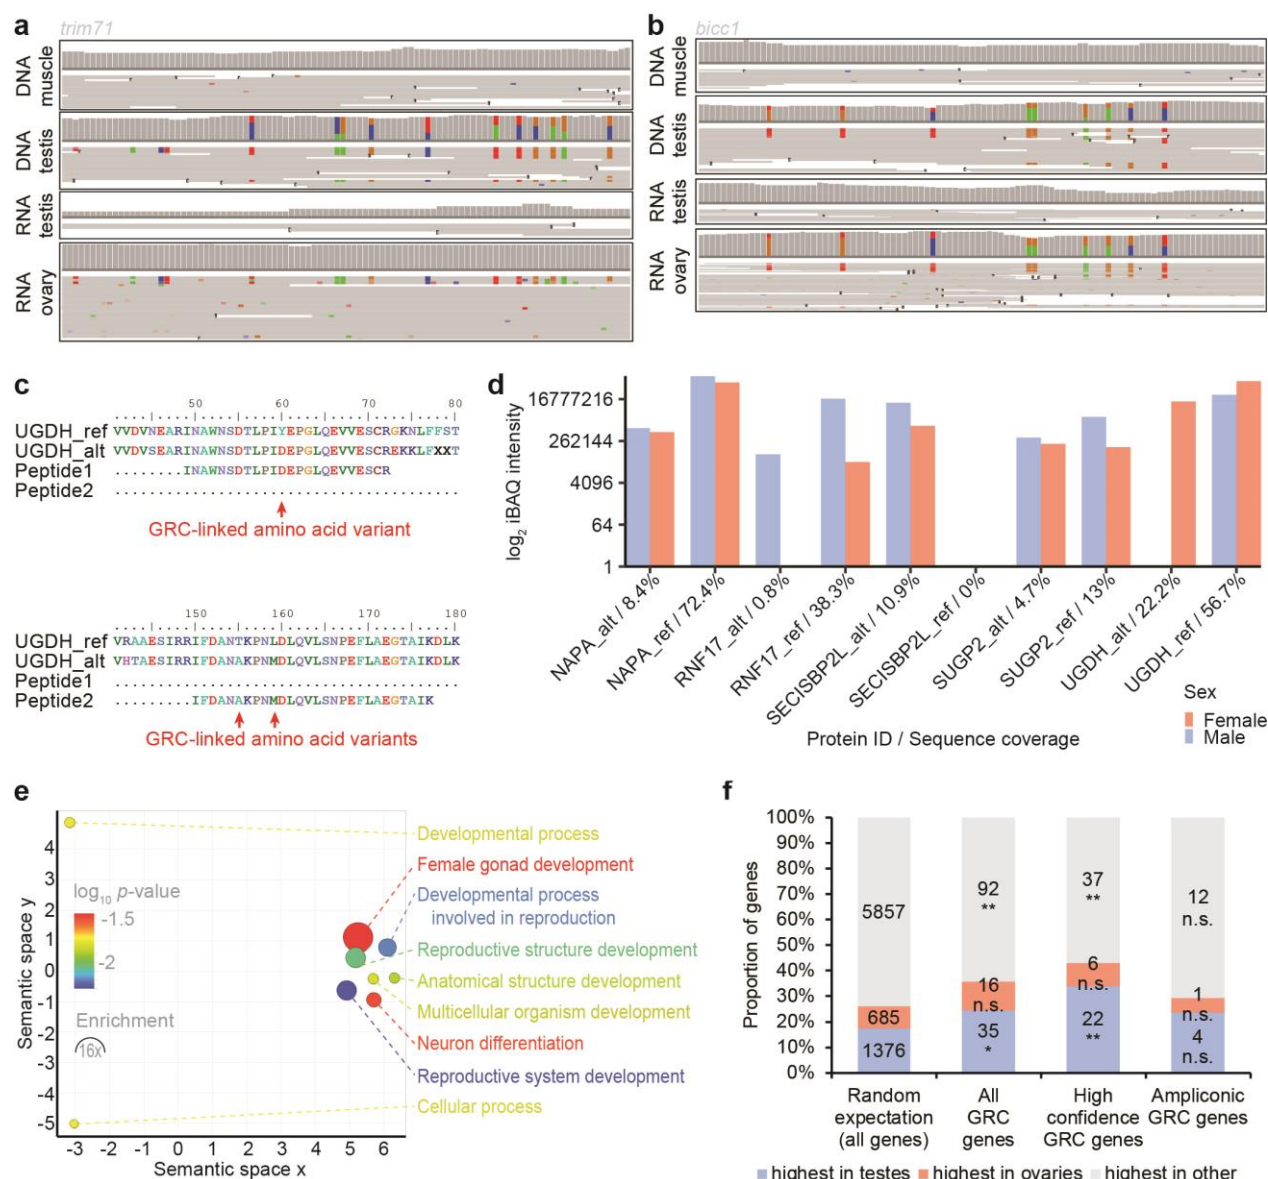

**Figure 2 | The zebra finch germline-restricted chromosome is expressed in male and female gonads. a-b,** Comparison of coverage and read pileups for DNaseq from Spain\_1 and Spain\_2 testis/muscle, RNAseq data from Spain\_1 and Spain\_2 testis, and available ovary RNAseq data<sup>9</sup>. Shown are 100-bp regions within *trim71* (a) and *bicc1* (b). Colours indicate SNPs deviating from the reference genome taeGut2. c, Example alignment of proteomics data showing peptide expression of the GRC-linked paralog of *ugdh* (alternative or ‘alt’; cf. reference or ‘ref’). d, Proteomic evidence for GRC protein expression (‘alt’) in comparison to their A-chromosomal paralog (‘ref’) in 7 sampled testes and 2 sampled ovaries. Only GRC paralogs of RNF17 and UGDH appear to be expressed in a sex-specific manner. e, Gene ontology term enrichment analysis of the 115 high-confidence GRC-linked genes (77 mapped gene symbols). Colours indicate the log<sub>10</sub> of the false discovery rate *p*-value, circle sizes denote fold enrichment above expected values. f, Expression evidence for orthologs of three different sets of GRC genes in testes, ovaries, or other tissues in chicken<sup>18</sup>. Randomization tests show a significant enrichment for germline-expressed genes among the 115 high-confidence GRC genes and all 267 GRC genes, but not the 38 amplificonic GRC genes.

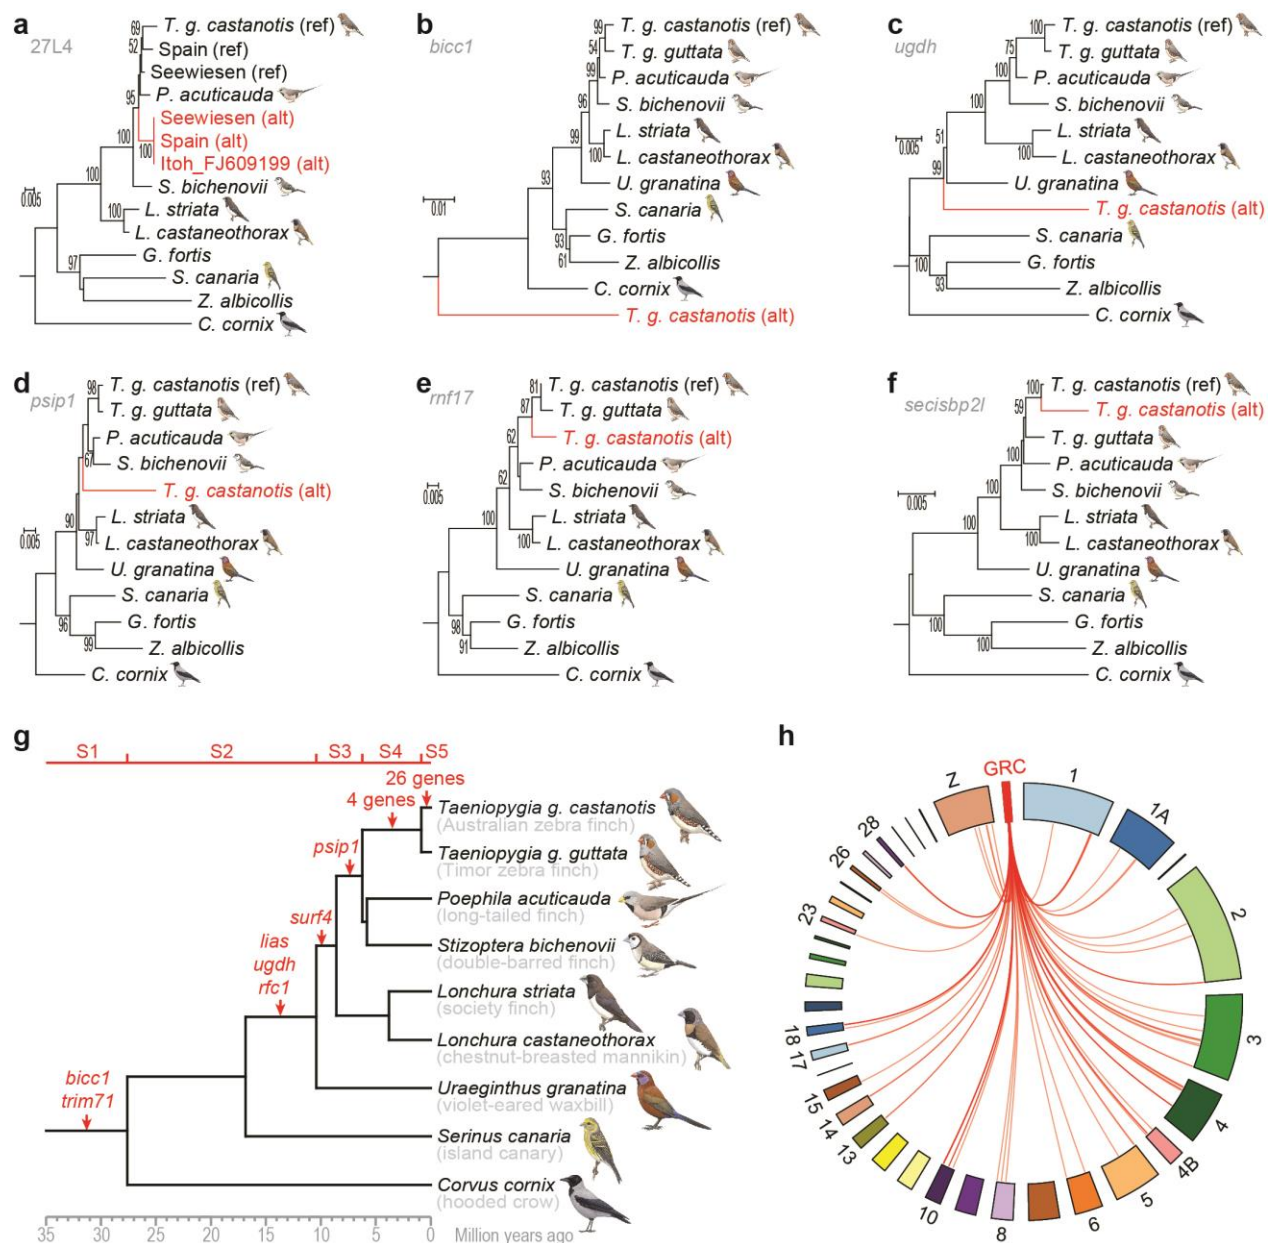

**Figure 3 | The zebra finch germline-restricted chromosome is ancient and highly dynamic.** **a**, Phylogeny of the intergenic 27L4 locus previously sequenced by Itoh et al.<sup>8</sup> suggests stable inheritance of the GRC paralog (alternative or ‘alt’ in red; cf. reference or ‘ref’) among the sampled zebra finches. **b-f**, Phylogenies of GRC-linked genes (‘alt’, in red; most selected from expressed genes) diverging from their A-chromosomal paralogs (‘ref’) before/during early songbird evolution (**b**; *bicc1*, stratum 1; cf. Extended Data Fig. 5), during songbird evolution (**c**; *ugdh*, stratum 2), during estrildid finch evolution (**d**; *psip1*, stratum 3), in the ancestor of the zebra finch species (**e**; *rnf17*, stratum 4), and in the Australian zebra finch subspecies (**f**; *secisbp2l*; stratum 5). The maximum likelihood phylogenies in panels a-f (only bootstrap values  $\geq 50\%$  shown) include available somatic genome data from estrildid finches and other songbirds. **g**, Species tree of selected songbirds showing the emergence of evolutionary strata (S1–S5) on the GRC (red gene names). Molecular dates are based on previous phylogenies<sup>22,25</sup>. Bird illustrations were used with permission from Lynx Edicions. **h**, Circos plot indicating A-chromosomal origin of high-confidence GRC-linked genes from 18 autosomes and the Z chromosome. Note that A-chromosomal paralogs of 37 genes remain unplaced on chromosomes in the current zebra finch reference genome *taeGut2*.

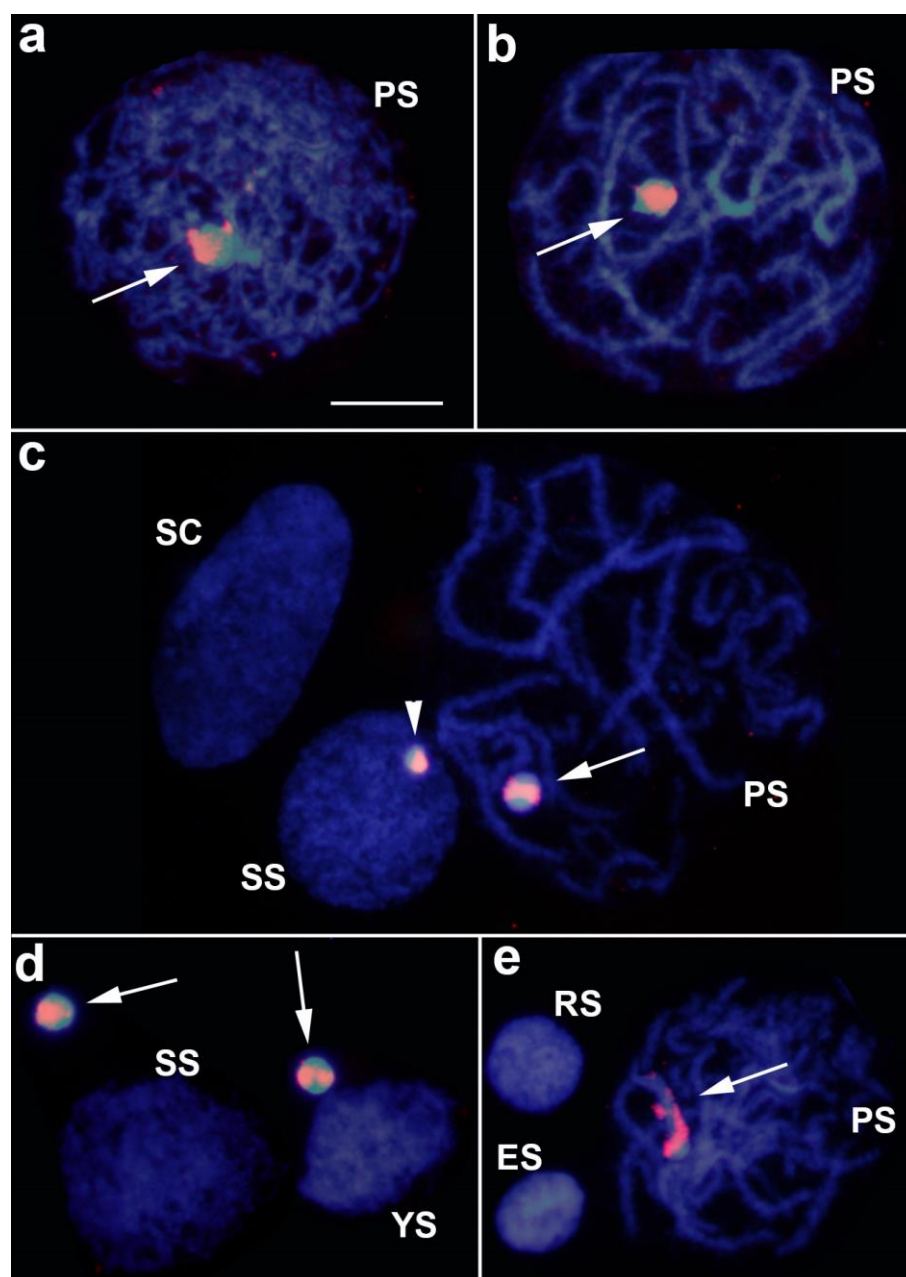

313  
314 **Extended Data Figure 1 | FISH analysis in testis cells of the Spain\_1 zebra finch individual using the *dph6***  
315 **probe (red) counterstained with DAPI (blue).** Note the presence of primary (PS) and secondary (SS)  
316 spermatocytes, young spermatids (YS) and maturing spermatids at round (RS) and elongating (ES) stages. Also note  
317 that the *dph6* probe hybridizes with only part of the GRC chromosome (arrow), and this is apparent in PS at  
318 leptotene-zygotene (a), pachytene (b-c, e) and in GRCs which failed to integrate into the main nucleus of SS or YS  
319 cells (d), with no FISH signal in somatic cells (SC) indicating GRC absence in somatic structural testis cells (c). The  
320 half size of GRC in the SS cell in panel c, compared with that in the PS next to it and that those lying outside nuclei  
321 in panel d, indicates that GRC sometimes divides equationally in the first meiotic division (resulting in the half sized  
322 GRC body in panel c) but, in most cases, it divides reductionally yielding the large sized GRCs in panel d. Note that  
323 RS and ES nuclei in panel e lack FISH signal, indicating GRC absence. All photographs were made at the same  
324 magnification, and the scale bar in panel a indicates 10  $\mu$ m.



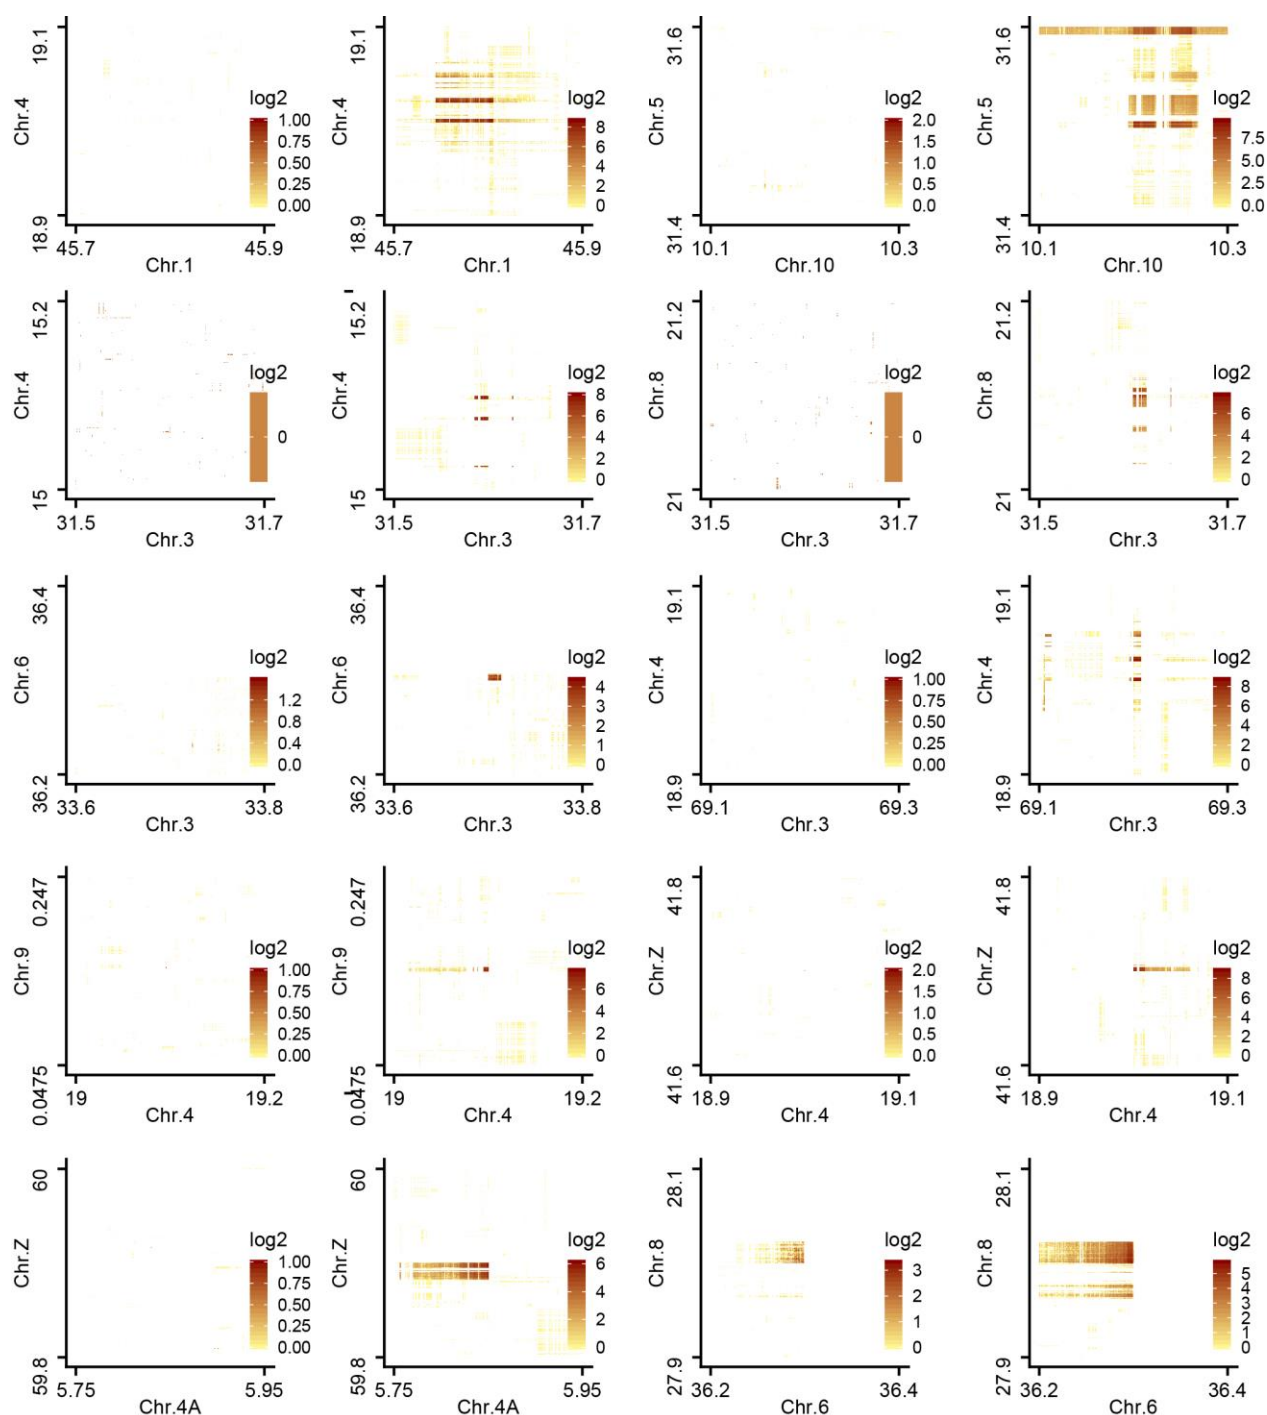

**Extended Data Figure 2 | Testis-specific linked-read barcode sharing between A chromosomes indicates GRC haplotypes.** Plots show side-by-side comparison of the inter-chromosomal barcode overlap for 200-kb regions for the liver and testis, respectively (chromosome position scale in Mb). With the exception of the interaction between chromosome 6 and chromosome 8 (bottom right) showing some background in the liver sample (potentially due to a shared A-chromosomal rearrangement), all inter-chromosomal structural variants were testis-specific and thus indicative of being on the same haplotype on the GRC. We exported barcode overlap matrices from the Loupe browser for testis-specific structural variants called by LongRanger and plotted them in R (v. 3.5.1). We reassigned 0 values to “NA” (shown in white on the plot) and log<sub>2</sub>-transformed all values.

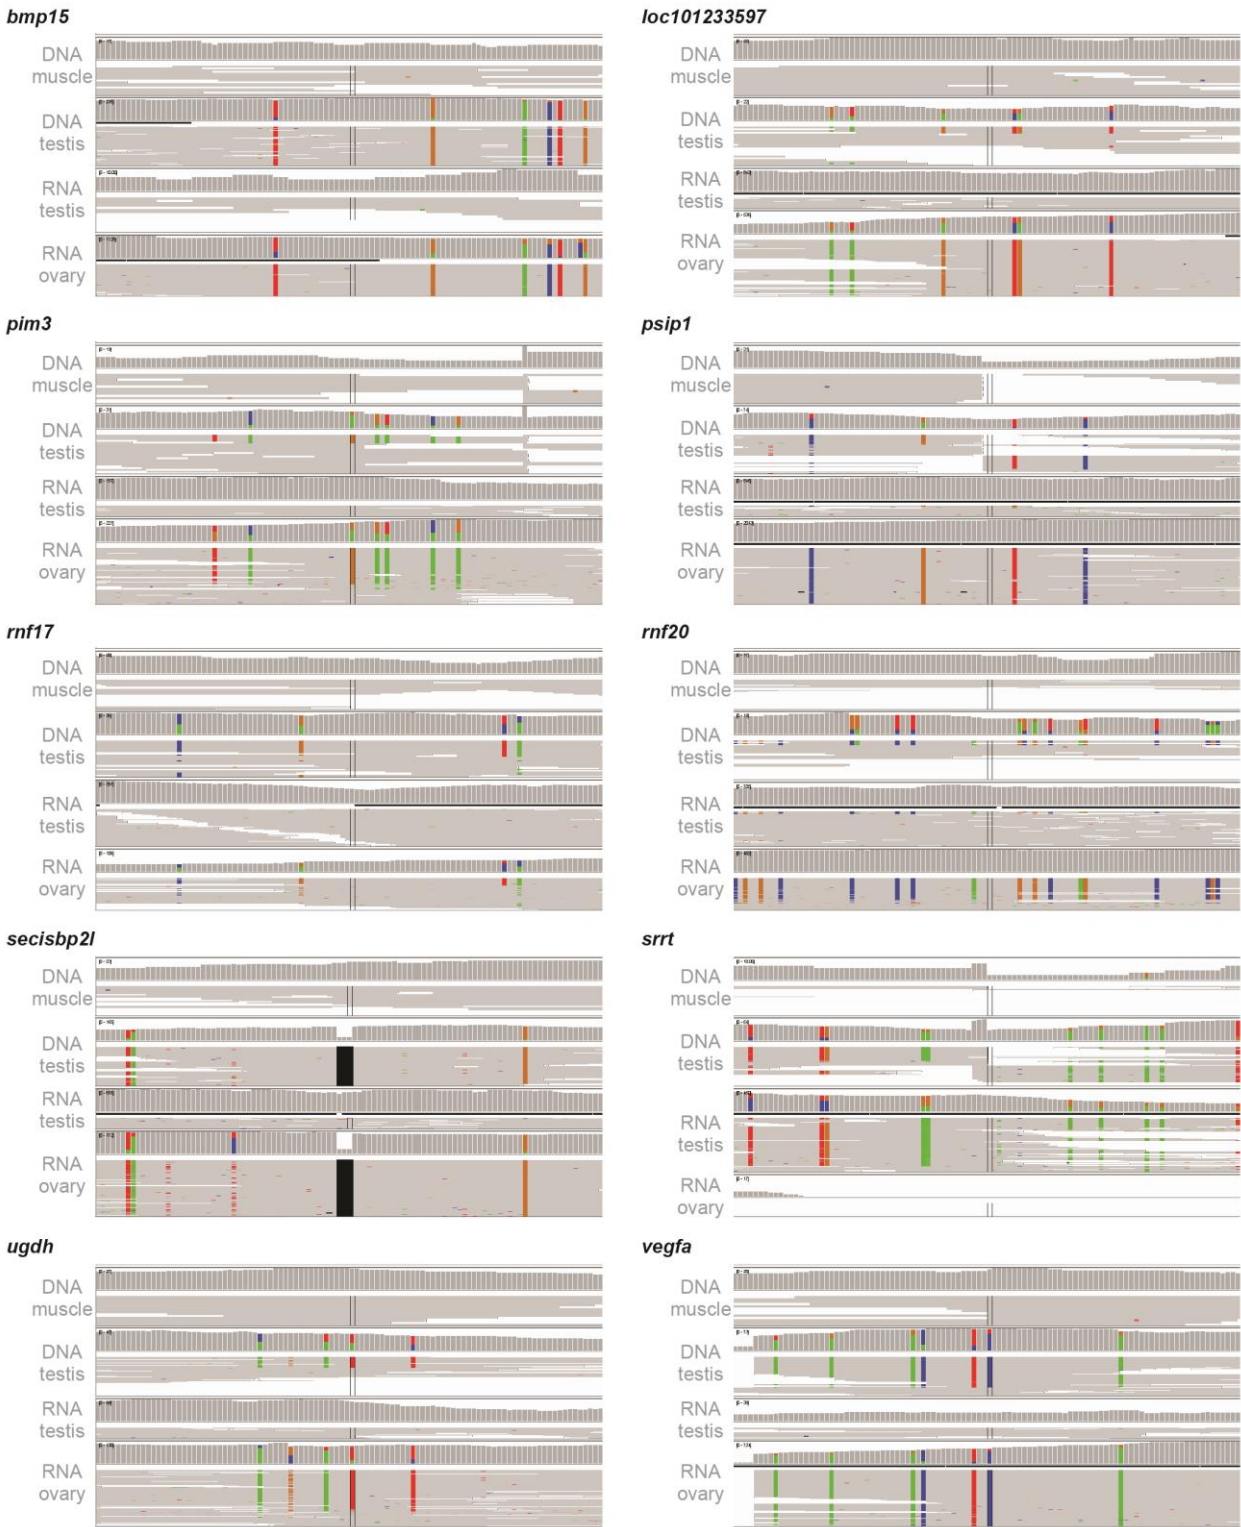

**Extended Data Figure 3 | Further examples for RNA expression of GRC-linked genes.** Comparison of coverage and read pileups for DNaseq from Spain\_1 and Spain\_2 testis/muscle, RNAseq data from Spain\_1 and Spain\_2 testis, and available ovary RNAseq data<sup>9</sup>. Shown are 100-bp regions within 10 selected genes. Colours indicate SNPs deviating from the zebra finch reference genome taeGut2.

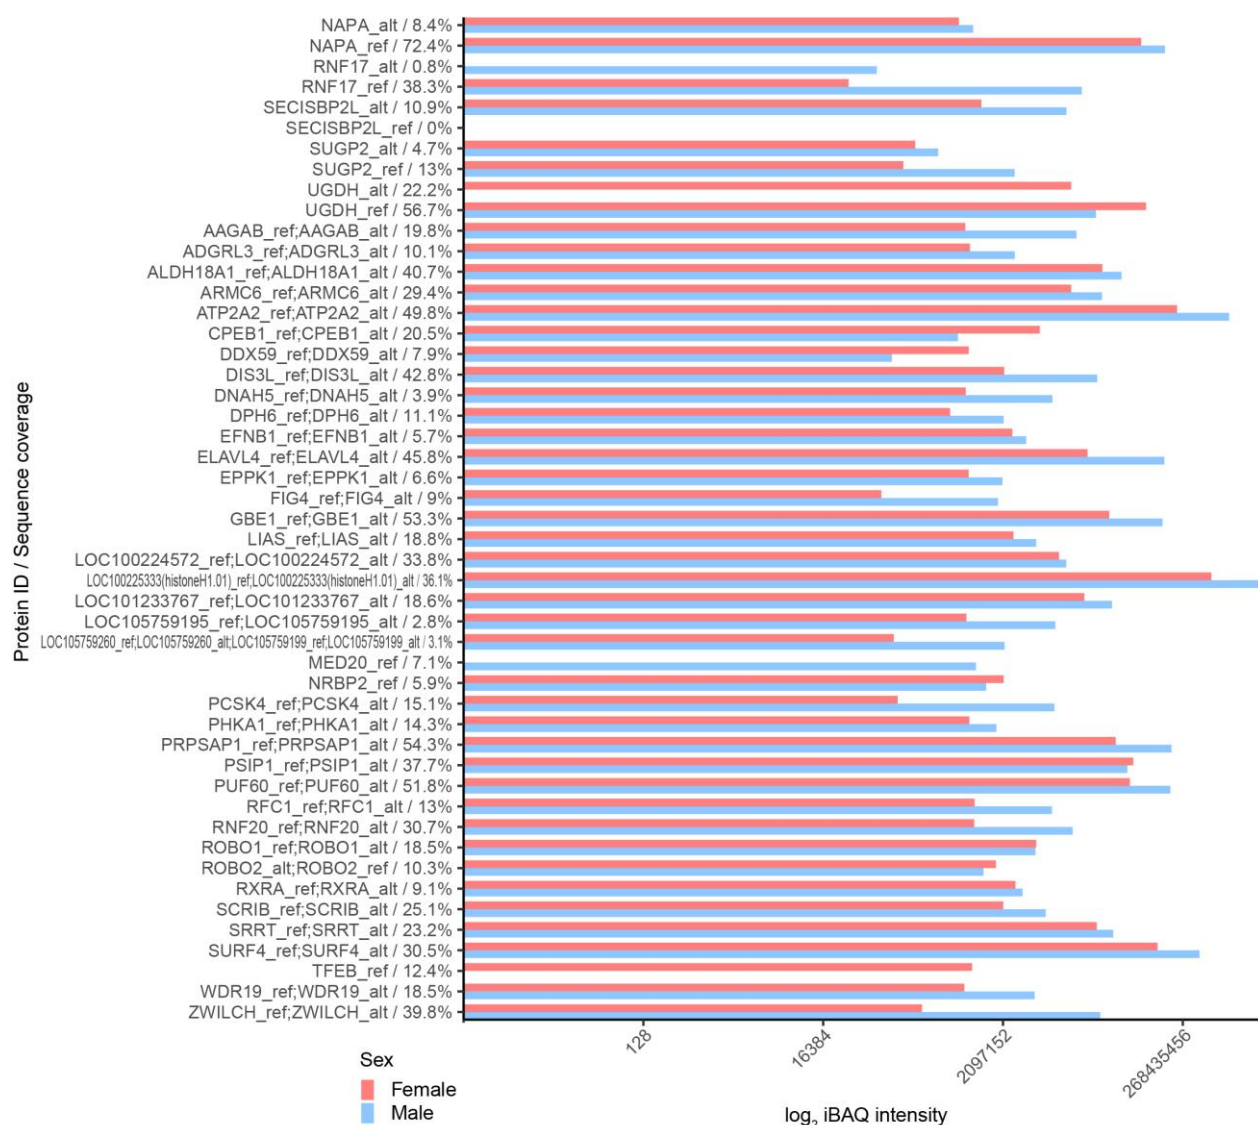

**Extended Data Figure 4 | Proteomic evidence for functional GRC protein presence in zebra finch testes and ovaries.** The five proteins listed at the top are also shown in Fig. 2d. GRC paralogs are denoted by the ‘alt’ suffix, where A-chromosomal paralogs are denoted by the ‘ref’ suffix. Sequence coverage corresponds to the peptide coverage percentage of the reference protein sequence. Entries of only one protein identification have sufficient evidence at the peptide level to differentiate between the GRC and A-chromosomal paralogs due to coverage of non-identical regions between the both reference sequences; entries of more than one protein identification contain evidence of presence based solely on identical regions, thus cannot be differentiated at the proteomic level. Entries of only one protein identification without the corresponding ‘alt’ or ‘ref’ variant contain evidence that span the non-identical region only, thus the alternate variant need not be called.

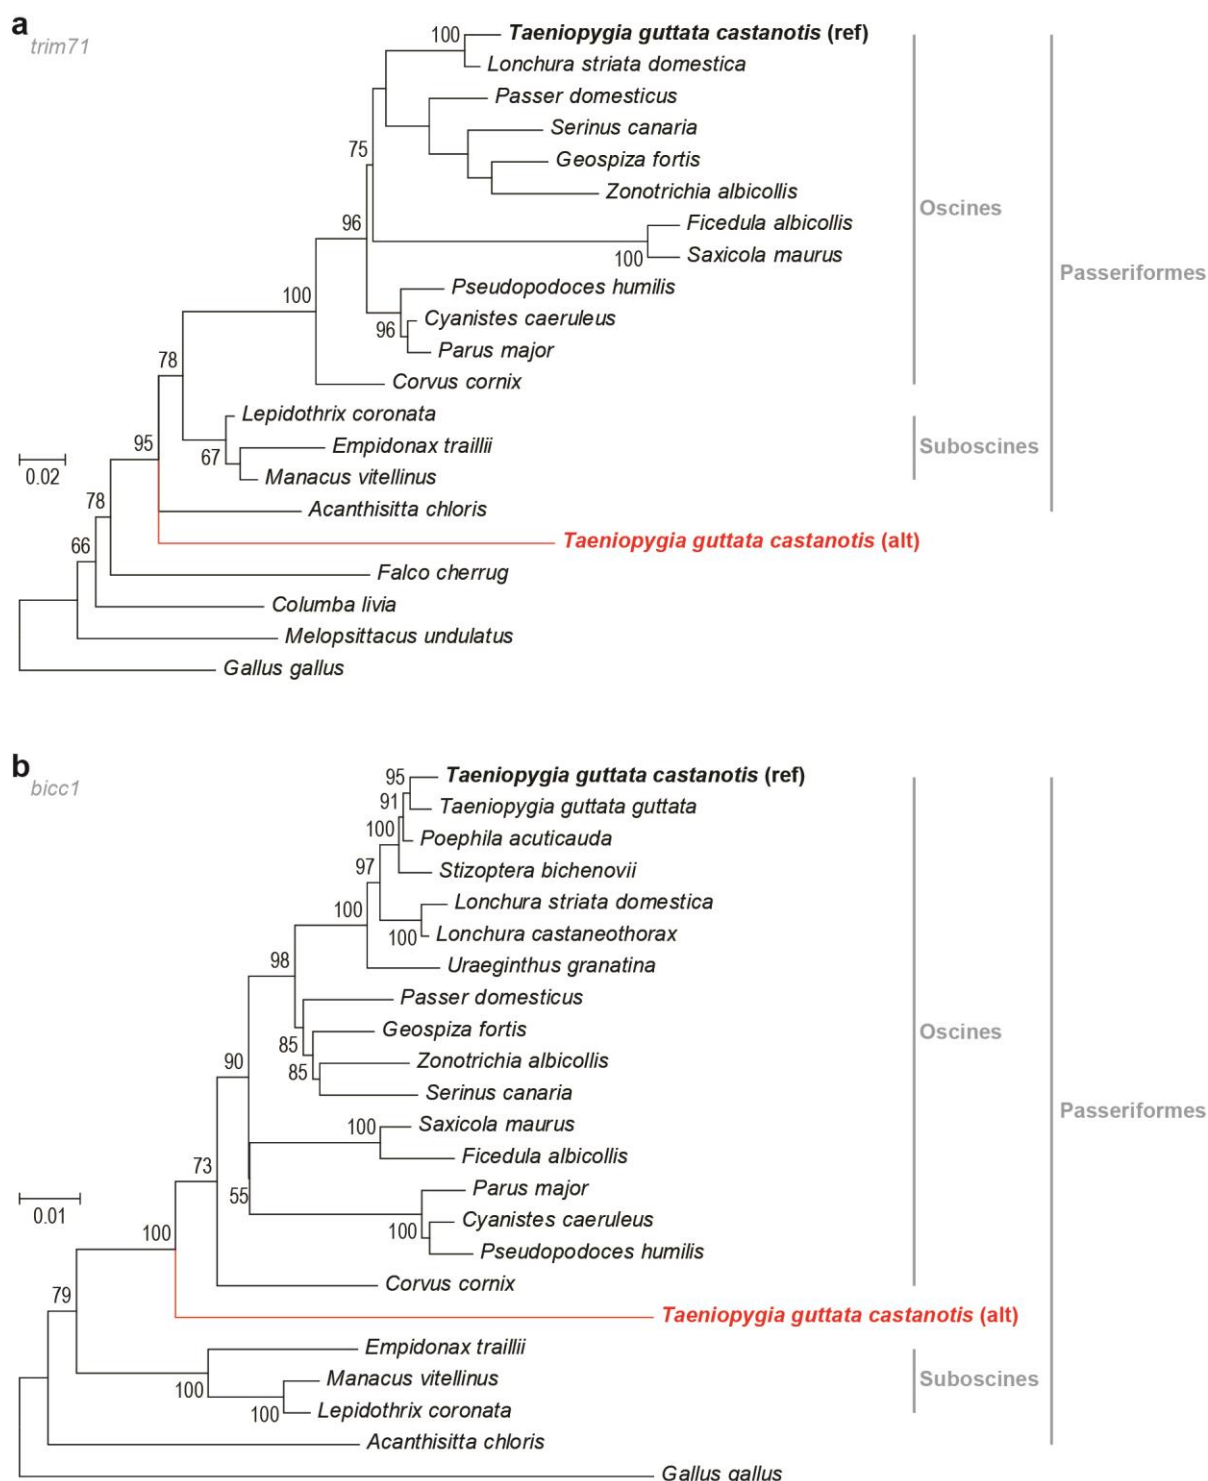

**Extended Data Figure 5 | Gene trees of GRC-linked genes from stratum 1 and their A-chromosomal paralogs from broad taxon sampling imply GRC emergence in the ancestor of Passeriformes. a,** Maximum likelihood gene tree of *trim71* (partitioned for codon positions) suggesting GRC linkage in the ancestor of Passeriformes. **b,** Maximum likelihood gene tree of *bicc1* (only 3' UTR) suggesting GRC linkage in the ancestor of oscine songbirds.
